# Supplementary figures and images for: Protocol for scoping review to identify current paediatric hypertension surveillance techniques in the sub-Saharan African region
Source: Research Square preprint supplement (doi:10.21203/rs.3.rs-3716785/v1), 2023-12-12

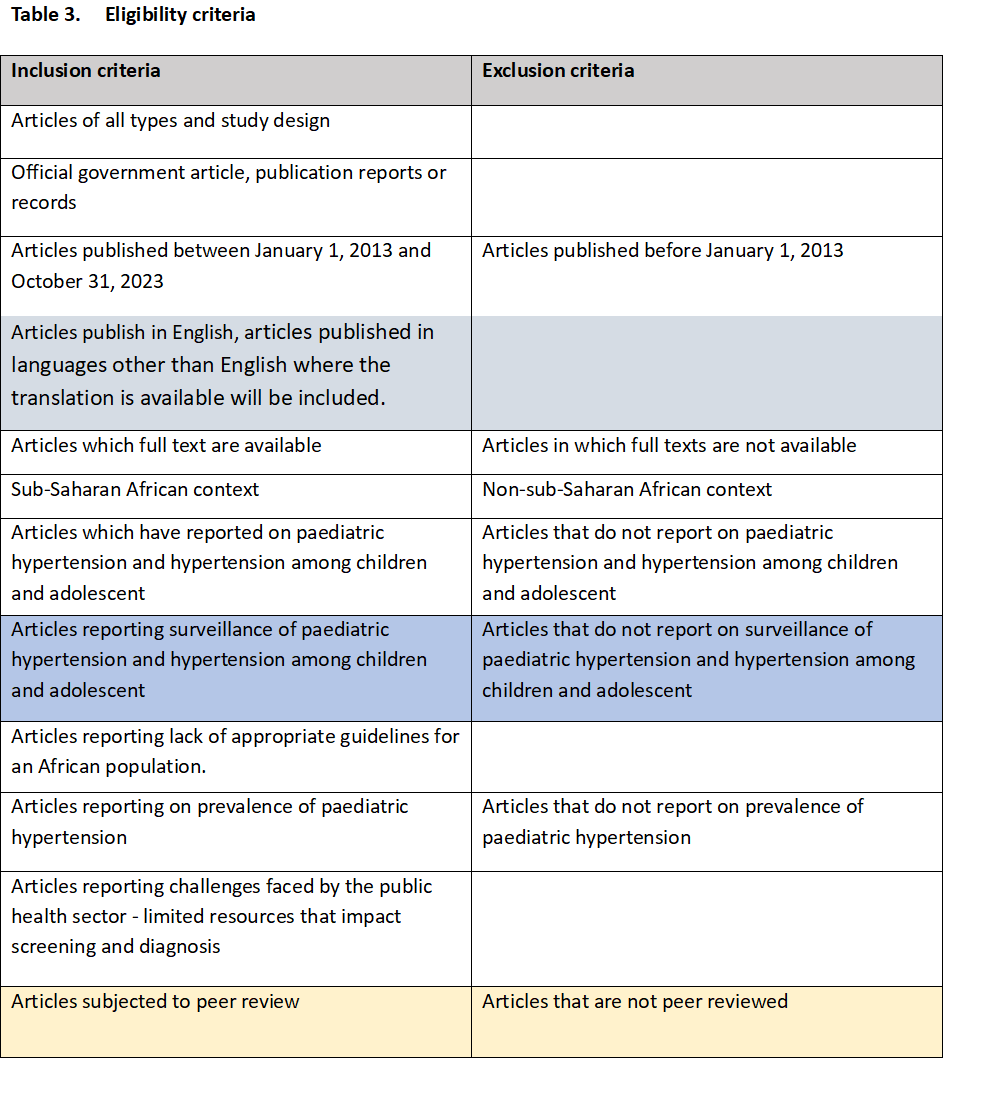

Supplement: Supplementary file 1 [file 3f4d4d133396c283e9675fa6.docx]

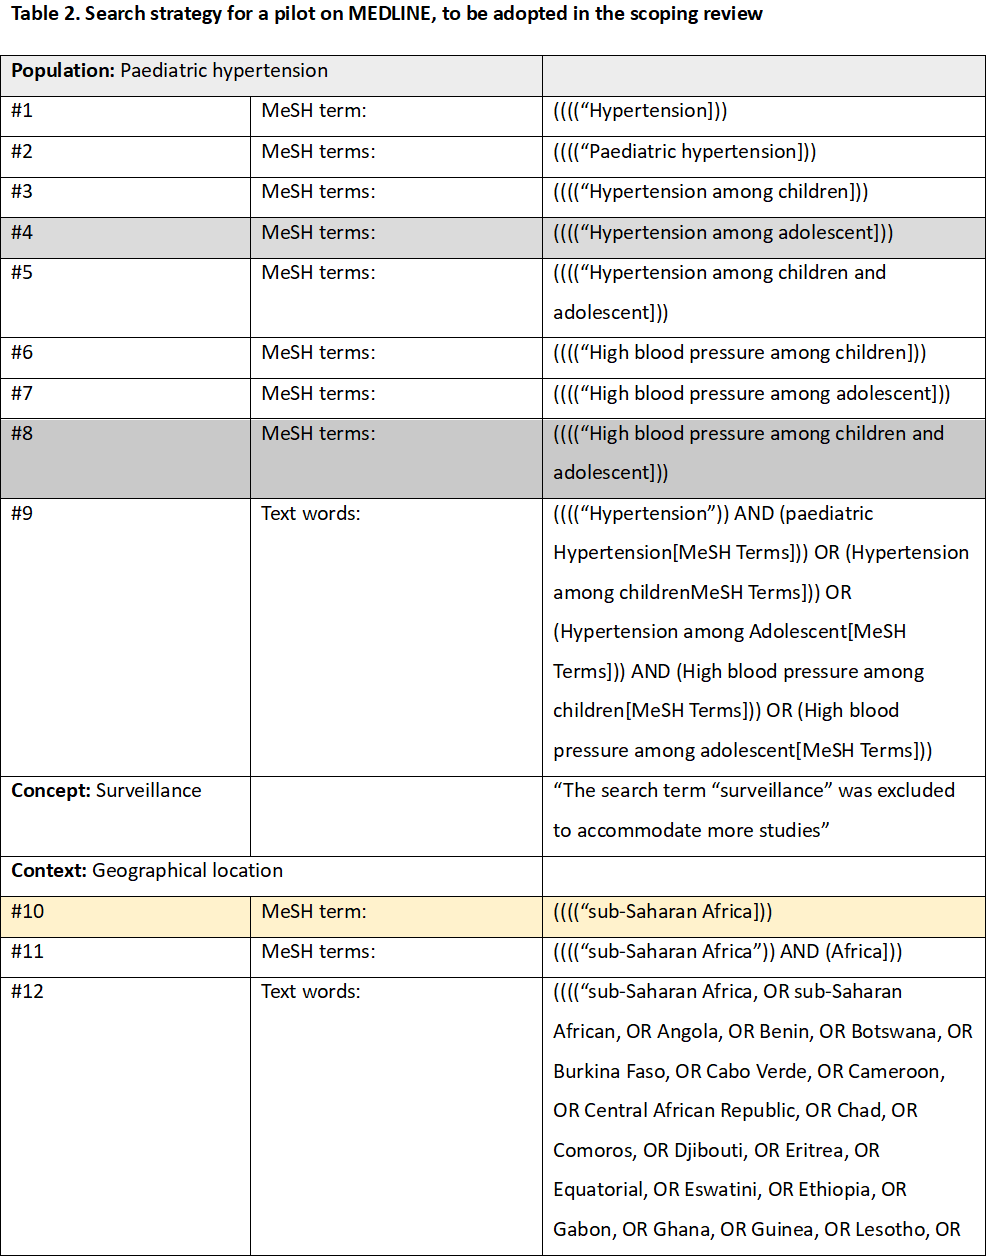

Supplement: Supplementary file 2 [file a064f36c2ca461f88a3d0470.docx]

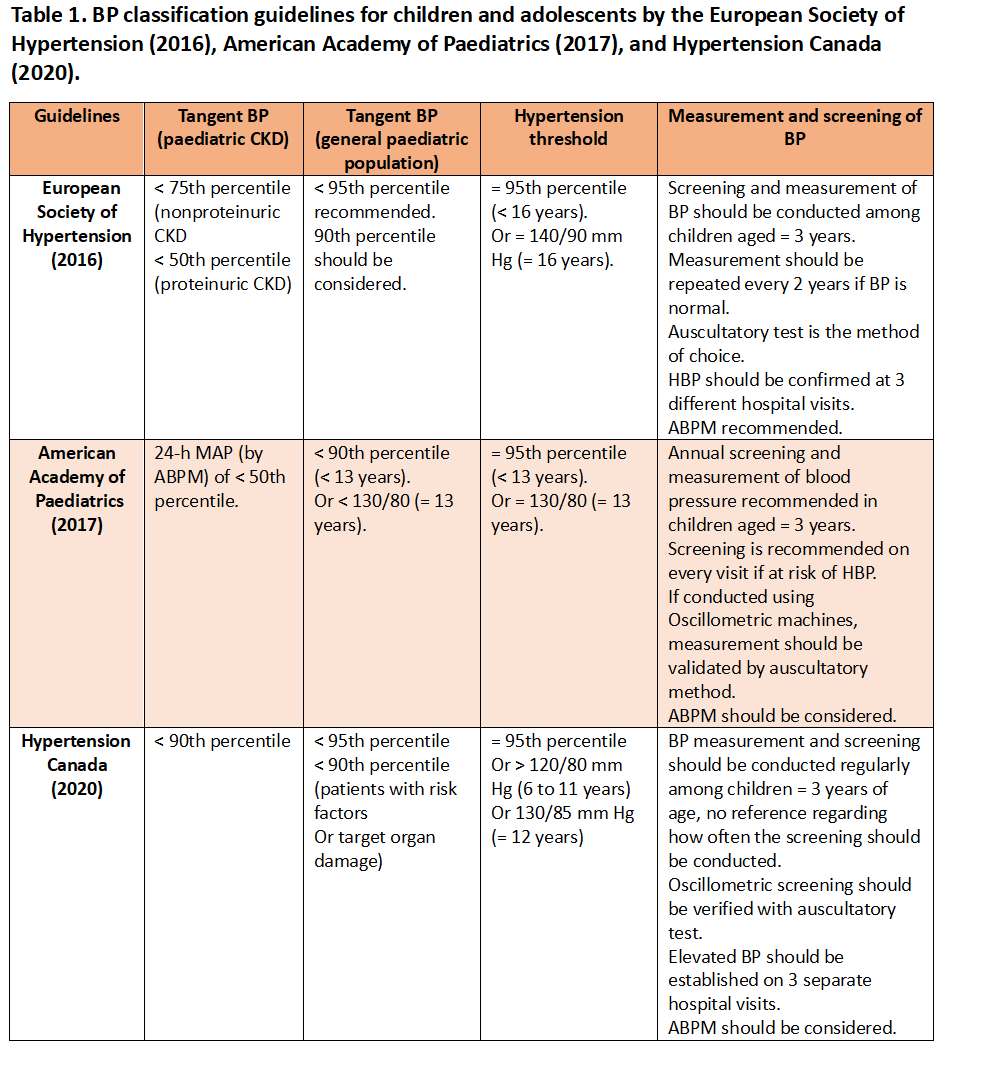

Supplement: Supplementary file 3 [file afd052aaf72d6e8208b825ab.docx]

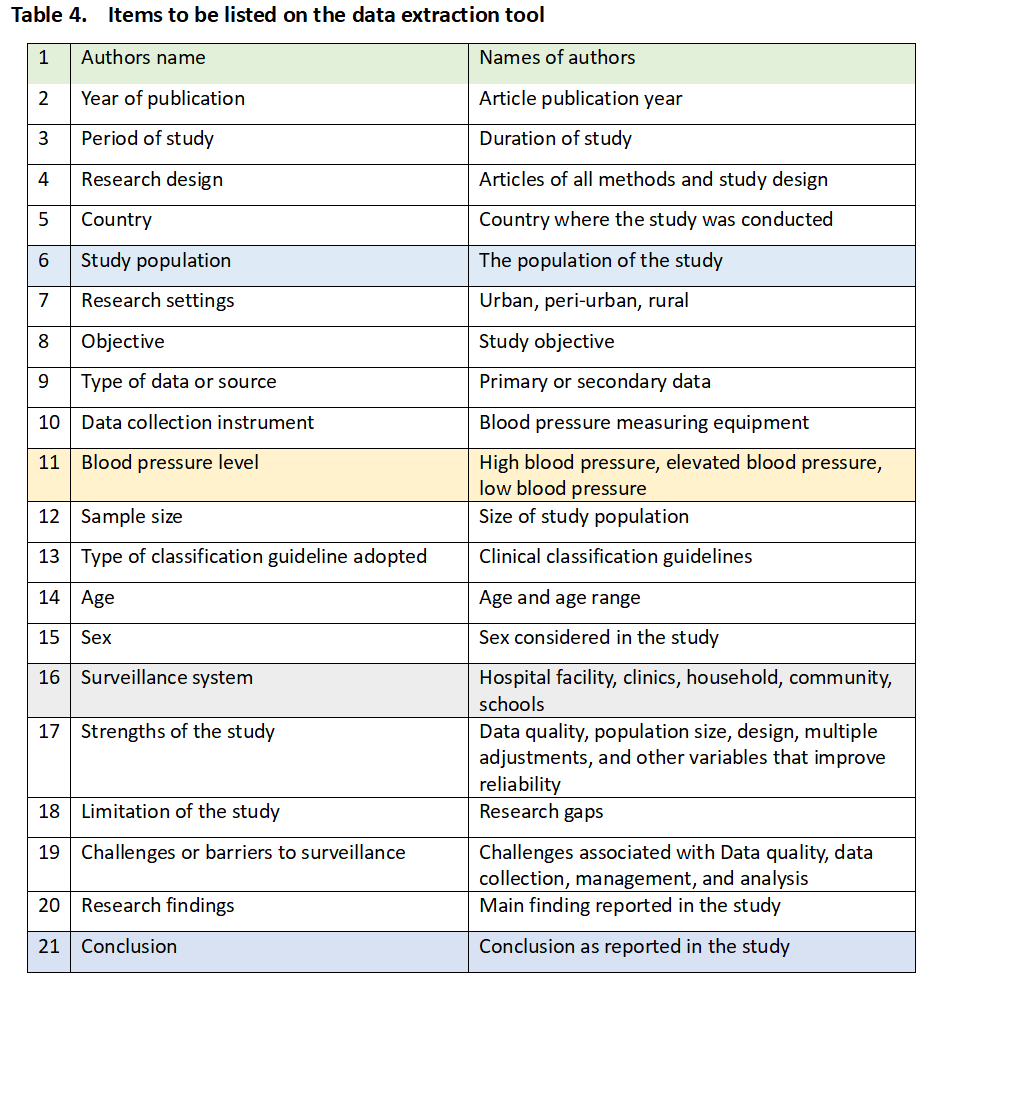

Supplement: Supplementary file 4 [file c27a84bc8a9df4e999a9cf42.docx]
